# Supplementary material for: In Silico and In Vitro Screening of 50 Curcumin Compounds as EGFR and NF-κB Inhibitors
Source: MDPI journal article supplement (doi:10.3390/ijms23073966), 2022-04-02
Supplement: s1 [file s1]

## Supplementary Figure S1

# ***In silico* and *in vitro* drug screening of curcumin and derivatives as EGFR and NF- $\kappa$ B inhibitors**

Mohamed E. M. Saeed<sup>1</sup>, Rümeysa Yücer<sup>1,2</sup>, Mona Dawood<sup>1,3</sup>, Mohamed-Elamir F. Hegazy<sup>1,4</sup>, Assia Drif<sup>1</sup>, Edna Ooko<sup>1</sup>, Onat Kadioglu<sup>1</sup>, Ean-Jeong Seo<sup>1</sup>, Fadhil S. Kamounah<sup>5</sup>, Salam J. Titinchi<sup>6</sup>, Beatrice Bachmeier<sup>7</sup>, Thomas Efferth<sup>1\*</sup>

<sup>1</sup> Department of Pharmaceutical Biology, Institute of Pharmacy and Biochemistry, Johannes Gutenberg University, Staudinger Weg 5, 55128, Mainz, Germany

<sup>2</sup> home addresses: Department of Pharmacognosy, Hamidiye Faculty of Pharmacy, University of Health Sciences Turkey, Üsküdar 34668 İstanbul, Turkey; and  
Department of Pharmacognosy and Phytochemistry, Faculty of Pharmacy, Bezmialem Vakif University, 34093 İstanbul, Turkey

<sup>3</sup> home address: Faculty of Medical Laboratory Sciences, Al-Neelain University, Khartoum, Sudan

<sup>4</sup> home address: Chemistry of Medicinal Plants Department, National Research Centre, 33 El-Bohouth St., Dokki, Giza 12622, Egypt.

<sup>5</sup> Department of Chemistry, University of Copenhagen, Universitetsparken 5, Copenhagen 2100, Denmark

<sup>6</sup> Department of Chemistry, University of the Western Cape, P/B X17, Bellville, 7535 Cape Town, South Africa.

<sup>7</sup> Institute of Pharmaceutical Biology, Goethe University, Frankfurt/Main, Germany

\* Corresponding author: Tel: +49-6131-39-25751. Fax: +49-6131-39-23752. E-mail: [efferth@uni-mainz.de](mailto:efferth@uni-mainz.de)



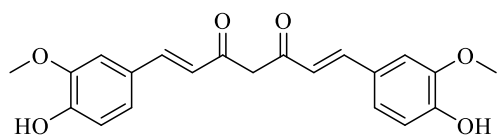

curcumin

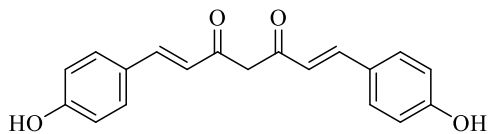

Bisdemethoxycurcumin

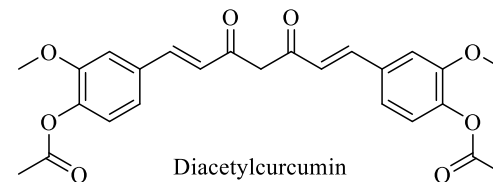

Diacetylcurcumin

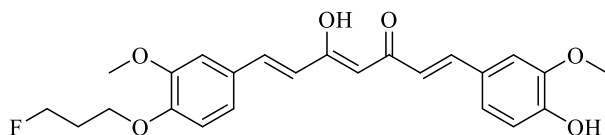

[18F]-curcumin

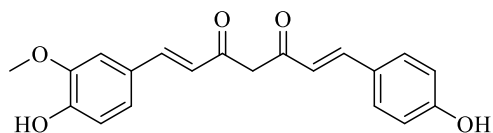

Monodemethoxycurcumin

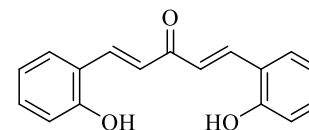

(E,E)-Bis(2-hydroxybenzylidene)acetone

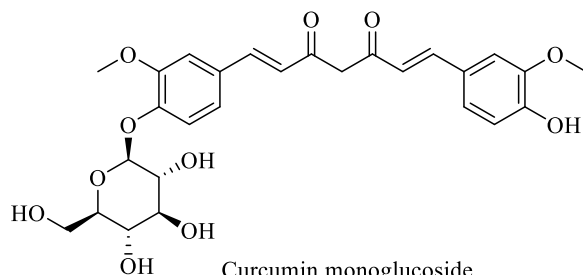

Curcumin monoglucoside

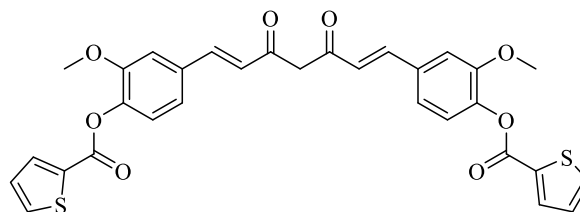

Di-O-(2-Thienoyl) curcumin

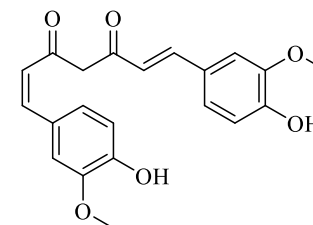

Cis-curcumin

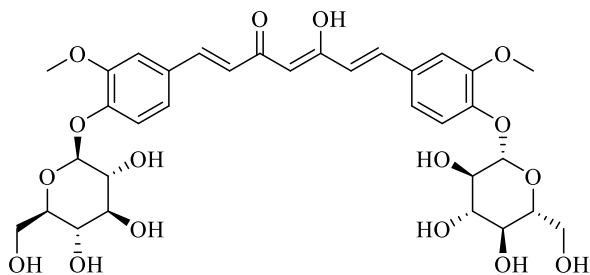

Curcumin diglucoside

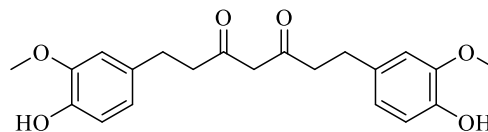

Tetrahydrocurcumin

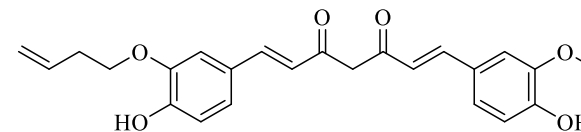

Allyl curcumin



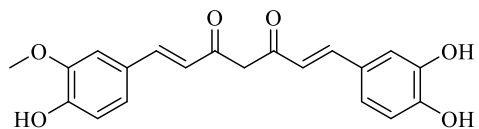

Monodemethylcurcumin

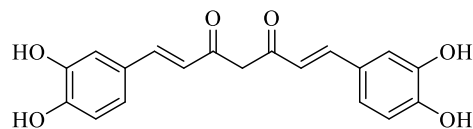

Didemethylcurcumin

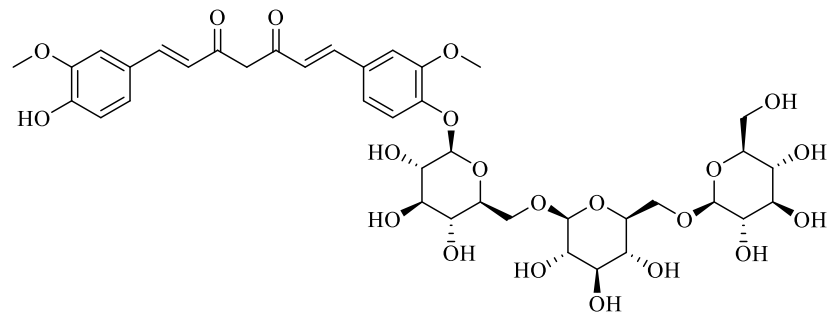

Curcumin-4'-*O*- $\beta$ -*D*-gentiotrioside

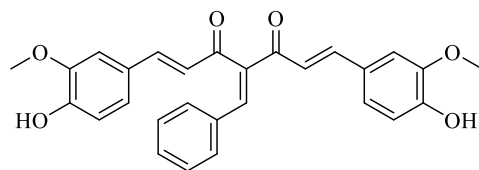

4-Benzylidene curcumin

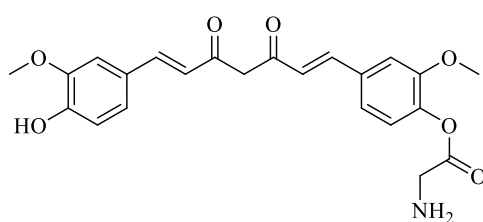

Monoglycinoyl curcumin

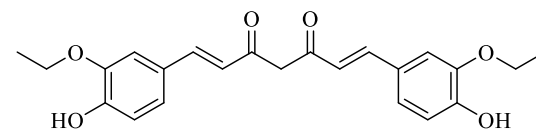

Ethylcurcumin

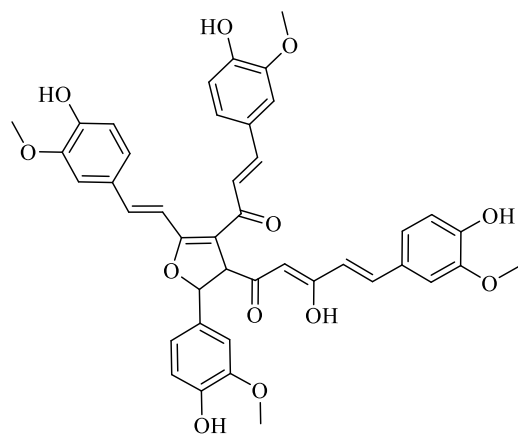

Curcumin dimer 1

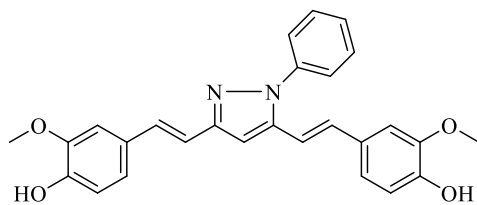

N-phenylpyrazole curcumin

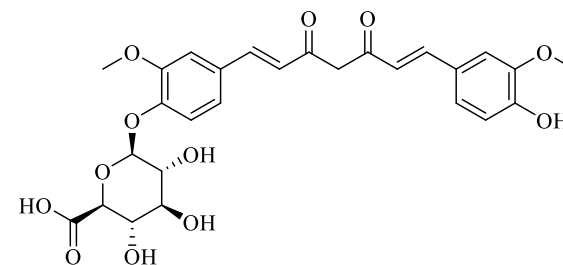

Curcumin  $\beta$ -*D*-glucuronide



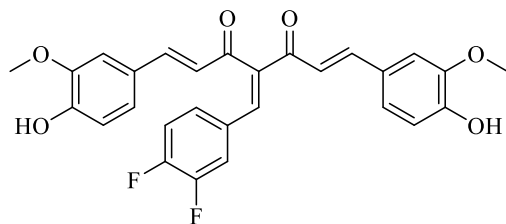

3,4-Difluorobenzylidene curcumin

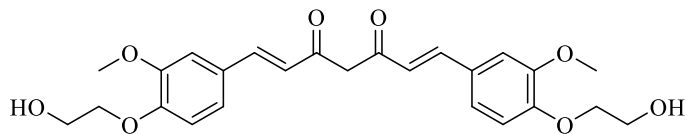

Di-*O*-(2-hydroxyethyl) curcumin

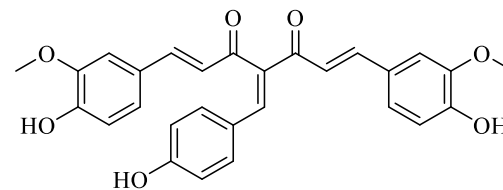

4-(4-hydroxybenzylidene) curcumin

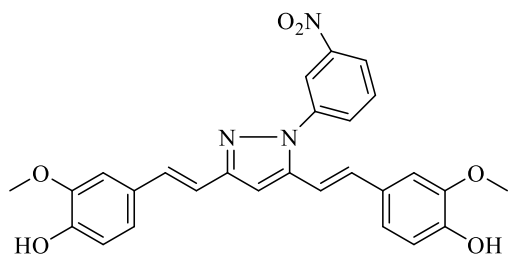

N-(3-nitrophenylpyrazole) curcumin

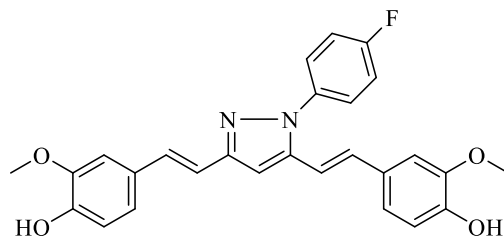

N-(4-fluorophenylpyrazole) curcumin

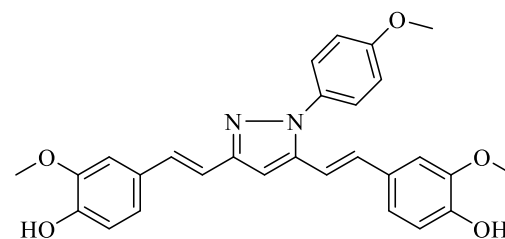

N-(4-methoxyphenylpyrazole) curcumin

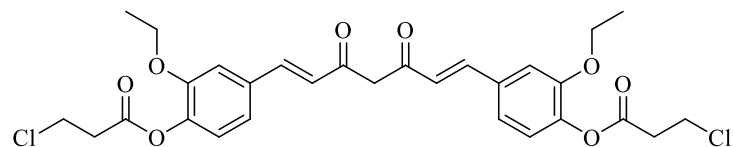

Di-*O*-chloropropionylethyl curcumin

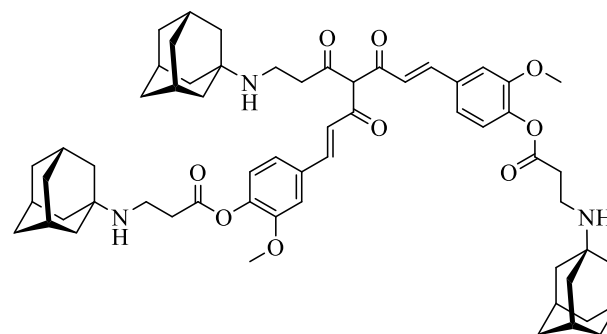

Curcumin tri adamantylaminoethylcarbonate



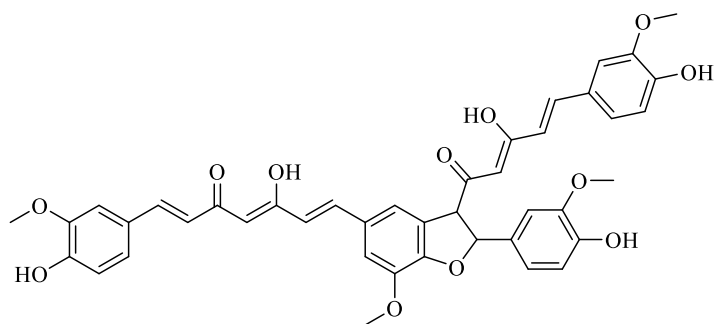

Curcumin dimer 2

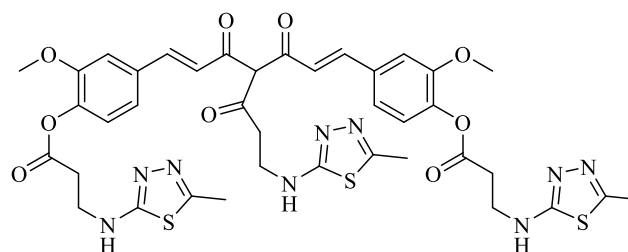

Curcumin tri-trithiadiazolaminoethylcarbonate

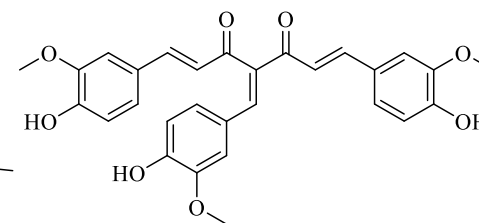

4-(4-hydroxy-3-methoxybenzylidene) curcumin

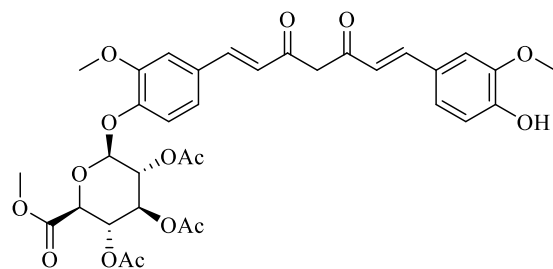

Curcumin  $\beta$ -D-glucuronide triacetate methyl ester

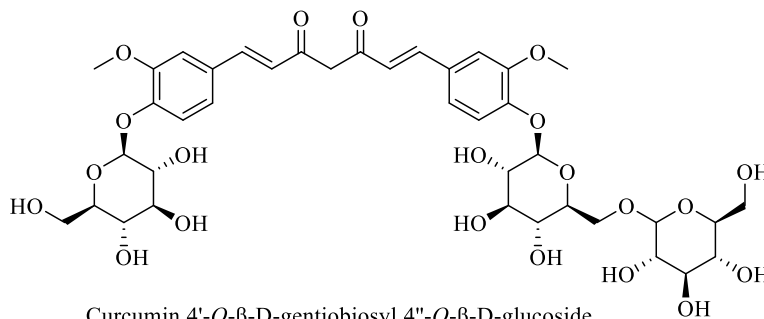

Curcumin 4'-O- $\beta$ -D-gentiobiosyl 4''-O- $\beta$ -D-glucoside

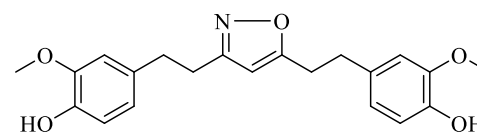

Tetrahydrocurcumin isoxazole

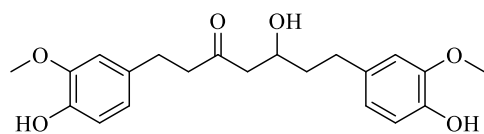

Hexahydrocurcumin

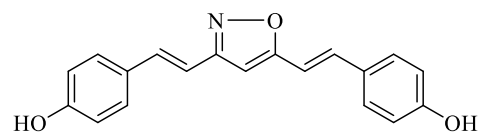

Bisdemethoxycurcumin isoxazole

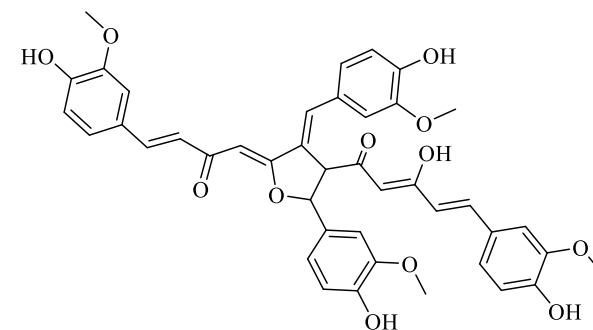

Curcumin dimer 3



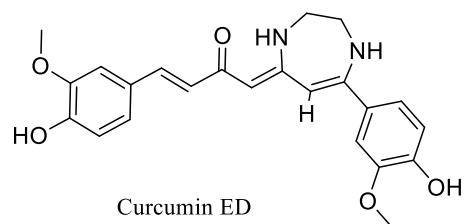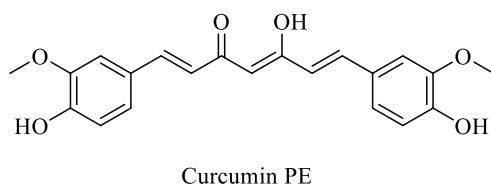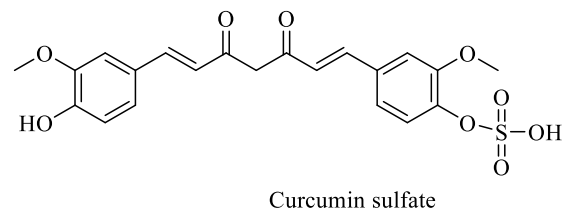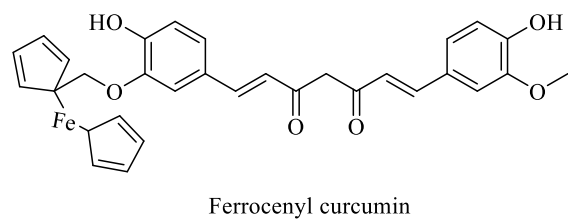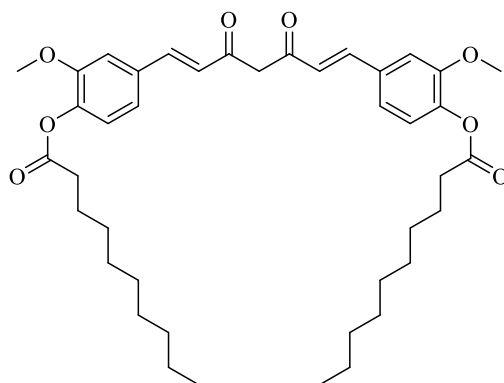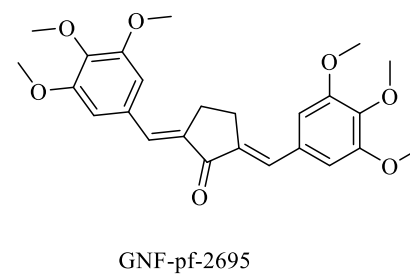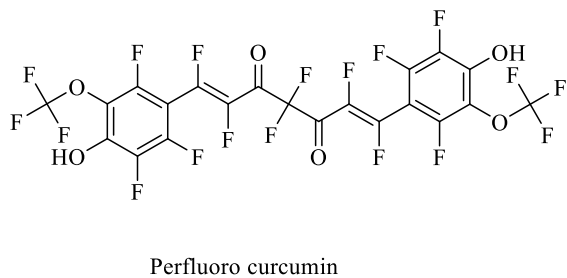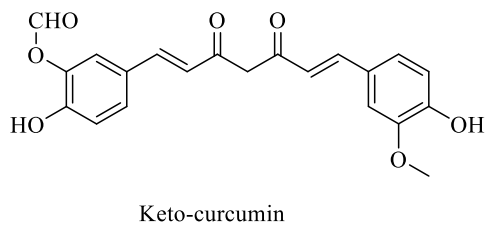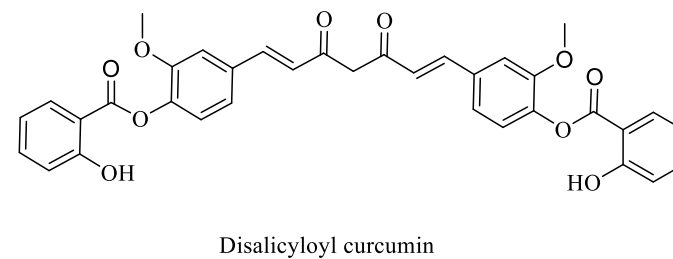



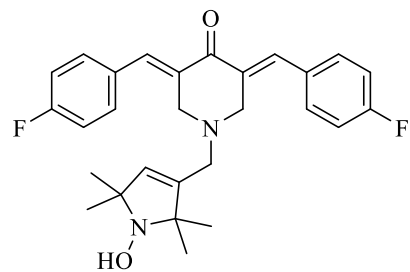

HO-3867

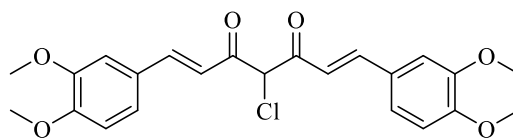

1A6

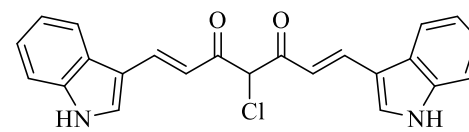

1A9
